# Supplementary material for: HIMMELI v1.0: HelsinkI Model of MEthane buiLd-up and emIssion for peatlands
Source: Copernicus journal article supplement (doi:10.5194/gmd-10-4665-2017), 2017-12-22
Supplement: Supplementary file 1 [file gmd-10-4665-2017-supplement.zip]

# HIMMELI 1.0 – Helsinki Model of MEthane buiLd-up and emIssion for peatlands

## User manual

---

This software is provided as supplementary material with:

Raivonen, M., Smolander, S., Backman, L., Susiluoto, J., Aalto, T., Markkanen, T., Mäkelä, J., Rinne, J., Peltola, O., Aurela, M., Lohila, A., Tomasic, M., Li, X., Larmola, T., Juutinen, S., Tuittila, E.-S., Heimann, M., Sevanto, S., Kleinen, T., Brovkin, V., and Vesala, T.: HIMMELI – Helsinki Model of MEthane buiLd-up and emIssion for peatlands, *Geosci. Model Dev.*, 2017.

The software can freely be used, on condition that this article is cited in publications. Please see the license.

---

**NB:** In some special cases, related to the input water table depth (WTD) and peat column thickness, the CH<sub>4</sub> production part of this model version may produce an error. I.e., when the input WTD is at or below rooting depth and, in some situations, when the peat thickness is greater than 2 m.

---

## 1. COMPILING

The software is coded in FORTRAN 90 and consists of the following files:

Makefile

|                        |                                                                           |
|------------------------|---------------------------------------------------------------------------|
| methane_main.f90       | - Main program                                                            |
| methane_parameters.f90 | - Contains model parameters and other control of the model run            |
| methane_geometry.f90   | - Controls the geometry of the grid, e.g. the movement of the water table |
| methane_output.f90     | - Controls the output of the model                                        |

The makefile is for compiling with gfortran. It is run with command **make**. This produces the executable file *model.exe*.

## 2. PARAMETERS

The set-up of the model runs is controlled via methane\_parameters.f90. It contains definitions of:

a) constants (such as the gas constant)

b) model parameter values

c) the set-up of the run. Specifically, you can define:

- peat depth
- layer thickness
- length of the model run, maximum is the length of the input data

### 3. INPUT FILES

The model requires as input two text files, named in the code *input\_data.txt* and *ztemp\_data.txt*.

a) *input\_data.txt* needs 5 columns:

| Column #       | 1     | 2                            | 3                                                                                  | 4                                            | 5                                                                           |
|----------------|-------|------------------------------|------------------------------------------------------------------------------------|----------------------------------------------|-----------------------------------------------------------------------------|
| Input variable | Day # | Air temperature<br>*unit: °C | Water table depth<br>*positive values <u>below</u><br>the peat surface<br>*unit: m | LAI<br>*unit: m <sup>2</sup> m <sup>-2</sup> | Rate of anoxic<br>respiration<br>*unit: mol m <sup>-2</sup> s <sup>-1</sup> |

b) *ztemp\_data.txt* is the soil temperature profile. Its column number depends on the peat layer structure: there should be daily temperature values for each peat layer, starting from the bottom layer in column 1. No column for time is used.

### 4. OUTPUT

The model outputs the following text files:

- a) *output\_methane\_water.txt* – time series of methane concentrations in water-filled peat layers
- output\_co2\_water.txt* – time series of carbon dioxide concentrations in water-filled peat layers
- output\_oxygen\_water.txt* – time series of oxygen concentrations in water-filled peat layers
- output\_methane\_air.txt* – time series of methane concentrations in air-filled peat layers
- output\_co2\_air.txt* – time series of carbon dioxide concentrations in air-filled peat layers
- output\_oxygen\_air.txt* – time series of oxygen concentrations in air-filled peat layers

In these concentration files, there are 4 columns, titled *t*, *y*, *w* and *conc*. Column 1 (*t*) is the day number, column 2 (*y*) is the thickness of the layer [m], column 3 (*w*) is the time step [d], and column 4 (*conc*) is the concentration of the compound [mol m<sup>-3</sup>]. The daily set of concentrations always starts from the bottom layer.

- b) *output\_fluxes.txt* – time series of fluxes of methane, CO<sub>2</sub> and oxygen between the soil and the atmosphere, separated to the different transport routes
- output\_processes.txt* – time series of removal and production rates of methane, CO<sub>2</sub> and oxygen in the total peat column, separated to the different microbial or transport processes

The columns in *output\_fluxes.txt* are:

- 1 *t*
- 2 diffusion of methane [mol s<sup>-1</sup> m<sup>-2</sup>]
- 3 plant transport of methane [mol s<sup>-1</sup> m<sup>-2</sup>]
- 4 ebullition of methane directly to atmosphere [mol s<sup>-1</sup> m<sup>-2</sup>]
- 5 total ebullition of methane (including ebullition that is retained in air-filled peat layers above the water table) [mol s<sup>-1</sup> m<sup>-2</sup>]
- 6 diffusion of CO<sub>2</sub> [mol s<sup>-1</sup> m<sup>-2</sup>]
- 7 plant transport of CO<sub>2</sub> [mol s<sup>-1</sup> m<sup>-2</sup>]
- 8 ebullition of CO<sub>2</sub> directly to atmosphere [mol s<sup>-1</sup> m<sup>-2</sup>]
- 9 total ebullition of CO<sub>2</sub> [mol s<sup>-1</sup> m<sup>-2</sup>]

|    |                                                                                                  |
|----|--------------------------------------------------------------------------------------------------|
| 10 | diffusion of O <sub>2</sub> [mol s <sup>-1</sup> m <sup>-2</sup> ]                               |
| 11 | plant transport of O <sub>2</sub> [mol s <sup>-1</sup> m <sup>-2</sup> ]                         |
| 12 | ebullition of O <sub>2</sub> directly to atmosphere [mol s <sup>-1</sup> m <sup>-2</sup> ]       |
| 13 | total ebullition of O <sub>2</sub> [mol s <sup>-1</sup> m <sup>-2</sup> ]                        |
| 14 | methane flux caused by changing water table depth [mol s <sup>-1</sup> m <sup>-2</sup> ]         |
| 15 | O <sub>2</sub> flux caused by changing water table depth [mol s <sup>-1</sup> m <sup>-2</sup> ]  |
| 16 | CO <sub>2</sub> flux caused by changing water table depth [mol s <sup>-1</sup> m <sup>-2</sup> ] |

The columns in *output\_processes.txt* are:

|    |                                                                                                                                                            |
|----|------------------------------------------------------------------------------------------------------------------------------------------------------------|
| 1  | t                                                                                                                                                          |
| 2  | diffusion of methane [mol s <sup>-1</sup> m <sup>-2</sup> ]                                                                                                |
| 3  | plant transport of methane [mol s <sup>-1</sup> m <sup>-2</sup> ]                                                                                          |
| 4  | ebullition of methane directly to atmosphere [mol s <sup>-1</sup> m <sup>-2</sup> ]                                                                        |
| 5  | total ebullition of methane (including ebullition that is retained in air-filled peat layers above the water table) [mol s <sup>-1</sup> m <sup>-2</sup> ] |
| 6  | methane production in anoxic respiration [mol s <sup>-1</sup> m <sup>-2</sup> ]                                                                            |
| 7  | methane consumption in oxidation [mol s <sup>-1</sup> m <sup>-2</sup> ]                                                                                    |
| 8  | diffusion of CO <sub>2</sub> [mol s <sup>-1</sup> m <sup>-2</sup> ]                                                                                        |
| 9  | plant transport of CO <sub>2</sub> [mol s <sup>-1</sup> m <sup>-2</sup> ]                                                                                  |
| 10 | ebullition of CO <sub>2</sub> directly to atmosphere [mol s <sup>-1</sup> m <sup>-2</sup> ]                                                                |
| 11 | total ebullition of CO <sub>2</sub> [mol s <sup>-1</sup> m <sup>-2</sup> ]                                                                                 |
| 12 | CO <sub>2</sub> production in anoxic respiration [mol s <sup>-1</sup> m <sup>-2</sup> ]                                                                    |
| 13 | CO <sub>2</sub> production in oxic respiration [mol s <sup>-1</sup> m <sup>-2</sup> ]                                                                      |
| 14 | CO <sub>2</sub> production in methane oxidation [mol s <sup>-1</sup> m <sup>-2</sup> ]                                                                     |
| 15 | diffusion of O <sub>2</sub> [mol s <sup>-1</sup> m <sup>-2</sup> ]                                                                                         |
| 16 | plant transport of O <sub>2</sub> [mol s <sup>-1</sup> m <sup>-2</sup> ]                                                                                   |
| 17 | ebullition of O <sub>2</sub> directly to atmosphere [mol s <sup>-1</sup> m <sup>-2</sup> ]                                                                 |
| 18 | total ebullition of O <sub>2</sub> [mol s <sup>-1</sup> m <sup>-2</sup> ]                                                                                  |
| 19 | O <sub>2</sub> consumption in inhibition of methane production [mol s <sup>-1</sup> m <sup>-2</sup> ]                                                      |
| 20 | O <sub>2</sub> consumption in oxic respiration [mol s <sup>-1</sup> m <sup>-2</sup> ]                                                                      |
| 21 | O <sub>2</sub> consumption in methane oxidation [mol s <sup>-1</sup> m <sup>-2</sup> ]                                                                     |

These files contain partly overlapping data since the transport fluxes are recorded both in *output\_fluxes* and *output\_processes* files. However, the signs are different: in *output\_fluxes* an emission flux of a compound into the atmosphere is a positive flux while in *output\_processes* it is negative, signifying removal of the compound from the peat.
