# Supplementary material for: HIMMELI v1.0: HelsinkI Model of MEthane buiLd-up and emIssion for peatlands
Source: Copernicus journal article supplement (doi:10.5194/gmd-10-4665-2017), 2017-12-22
Supplement: Supplementary file 2 [file gmd-10-4665-2017-supplement.zip]

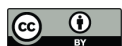

## *Supplement of*

# **HIMMELI v1.0: HelsinkI Model of MEthane buiLd-up and emIssion for peatlands**

**Maarit Raivonen et al.**

*Correspondence to:* Maarit Raivonen (maarit.raivonen@helsinki.fi)

- [gmd-10-4665-2017-supplement-title-page.pdf](#)
- [HIMMELI\\_v1.0.zip](#)

The copyright of individual parts of the supplement might differ from the CC BY 3.0 License.
